# Supplementary material
Source: publisher figshare collection journal article supplement (https://gsapubs.figshare.com/ndownloader/files/23306009)
Supplement: Supplementary file 1 [file 23306009]

# South-Pole Aitkin Basin Ejecta Reveal the Moon's Upper Mantle

## SUPPLEMENTAL MATERIAL:

### DATA AVAILABILITY:

Final Figures and Tables will be archived on Purdue's PURR data archive system. The iSALE computer code is available upon request from developers Garth Collins or Kai Wünnemann ([www.isale-code.de](http://www.isale-code.de)). The simulation results are available upon request from Jordan Kendall ([jordan.d.kendall@gmail.com](mailto:jordan.d.kendall@gmail.com)).

### HYDROCODE MODELING

We simulate the impact crater and ejecta formation (Supplementary Figure DR1) with the iSALE-3D shock physics code (Wünnemann et al., 2006; Collins et al., 2004; Elbeshausen et al., 2009; Elbeshausen and Wünnemann, 2011). The iSALE-3D code uses an Arbitrary Lagrangian-Eulerian formulation (Hirt et al., 1974). Previous studies validated the iSALE code against comparable hydrocodes, cratering observations, and laboratory experiments (Pierazzo et al., 2008; Davison et al., 2011; Elbeshausen and Wünnemann, 2011).

Our model Moon consists of a 680 km diameter iron core overlain by a 1400 km thick dunite mantle with a surface gravity of  $1.618 \text{ m/s}^2$  (Supplemental Table DR1). Dunite has a similar composition as the Moon's bulk mantle and the equation of state is well defined within the iSALE ANEOS library (Benz et al., 1989; Pierazzo et al., 1997). We model the Moon's iron core with the ANEOS tabular data for iron (Thompson, 1990). We infer that if a 15 km/s impact velocity will eject upper mantle material, then higher velocities will as well. We vary impact angle, between  $30^\circ$  and  $60^\circ$ , and impactor diameter, between 200 and 420 km (Table 1 and Supplemental Table DR1). This range of impact scenarios is in agreement with previous studies of the SP-A basin transient crater diameter (Potter et al., 2012). The model uses a pressure and damage dependent strength model, developed for rock-like materials (Collins et al., 2004), for dunite and a strain and strain-

rate dependent strength model for metals (Johnson and Cook, 1983) for the Moon's iron core (Supplemental Table DR2). The SPA-forming impact deposited a large amount of mantle material on the farside highlands of the moon, with an increasing concentration of crustal material at greater ranges.

It would have been more accurate to model the Moon's upper mantle as orthopyroxene for these simulations, but a shock equation of state for this material does not exist. The Hugoniot curves for forsterite and enstatite, however, are similar (Marsh 1980), so our use of dunite does not affect our conclusions. Similarly, we use dunite for the impactor only out of convenience: Crater excavation depends almost entirely on the mass and energy delivered by the impactor, not its composition. A mineralogically distinct crust is not included in these models, although a stiff mechanical surface layer is enforced by the initial temperature distribution, with a near-surface thermal gradient of 10 K/km, following the low value in Potter et al. 2012. This gradient may be too small for the time of the SPA impact (Laneuville et al., 2013) assume 17.5 K/km at 4 Gyr), but the thermal gradient has only a small effect on the transient (although not the final, collapsed) crater (Potter et al. 2012).

We assumed a crustal thickness of 50 km. This is on the thick side of the Wieczorek et al. 2012, crustal models, but our 10 km resolution forces a choice of either 40 or 50 km and we made the conservative choice.

We place Lagrangian tracers, which track the motion of a parcel of material through the Eulerian mesh, in the center of each cell of the simulation space (Supplemental Table DR1). We treat these tracers as proxies for the ejected mass from the impact, with each tracer representing a volume of 1000 km<sup>3</sup> (determined by the resolution of the simulation). We track the tracer trajectories and determine the locations where they ballistically emplace on the lunar surface relative to the current location of the SP-A basin (Figures 1, 2, and DR2).

The impact ejects Lagrangian tracer particles out of the opening transient crater. As the tracers pass through an altitude 40 km above the initial surface of the Moon, we determine if the tracers are ballistic from each tracer's position,  $\vec{x}_i$ , and velocity,  $\vec{v}_i$ , relative to the Moon's frame of reference. We determine the escape velocity at each tracer's position,  $\vec{v}_{i,esc} = \sqrt{2GM/|\vec{x}_i|}$ , where  $M = 7.348 \cdot 10^{22} kg$  is the mass of the Moon,  $G = 6.67384 \cdot 10^{-11} m^3 s^2 / kg$  is the gravitational constant. If the magnitude of the tracer velocity is below escape velocity,  $|\vec{v}_i| < |\vec{v}_{i,esc}|$ , we extrapolate a ballistic trajectory and impact point by determining the ballistic range and direction along the spherical Moon's surface.

We use the emplaced tracer positions to create a map of ejecta thickness (Figure 1), excluding any tracers that land within the transient crater diameter, inside of which crater collapse occurs (Melosh, 1989). We report the transient crater diameters, maximum depth of ejecta provenance, and volume of ejecta (Table 1). We place the emplaced tracer positions into equal surface area bins along the lunar surface. The longitude and the sine of the colatitude allow equal-area bins along the surface of the Moon. We calculate the ejecta thickness in each bin by dividing the volume of ejecta by the surface area of each equal-area bin. In order to calculate the volume of ejecta, we use the initial density of each cell at  $t=0$  s which varies with depth, as determined by hydrostatic equilibrium. Then, we use the initial density to calculate a mass for each tracer and the final volume, assuming a density (Wieczorek et al., 2013) of  $2650 kg/m^3$ . Next, we plot the results in latitude and longitude so that the SP-A basin is centered at  $-53.2^\circ$  latitude and  $191^\circ E$  longitude (Garrick-Bethell and Zuber, 2009) (Figure 1). Assuming a final density is uncertain because the impact ejects large volumes of mantle material and we may be overestimating the final volume by assuming a density of  $2650 kg/m^3$ . Retaining a density of  $3200 kg/m^3$  more appropriate for pure mantle material would decrease our estimates by  $\sim 20\%$ .

In addition to the results shown in Figure 2, we include two more bar plots of ejecta thickness along radial lines; in the direction of  $0^\circ$  and  $90^\circ$  from the direction of the

impact (Supplemental Figure DR2). We mark these lines in Figure 1 as the solid and dashed red lines respectively.

**Supplemental Table DR1: iSALE-3D model description (Chicxulub release)**

| Parameter description                          | Value                                |
|------------------------------------------------|--------------------------------------|
| Number of high resolution cells in x-direction | 450                                  |
| Number of high resolution cells in y-direction | 250                                  |
| Number of high resolution cells in z-direction | 450                                  |
| Cell size                                      | 10 km                                |
| Physical dimension of entire mesh, x-direction | -2700 km to +1800 km (horizontal)    |
| Physical dimension of entire mesh, y-direction | 0 to +2500 km (into plane of impact) |
| Physical dimension of entire mesh, z-direction | -1800 km to +2700 km (vertical)      |
| Surface Temperature                            | 300 K                                |
| Surface gravitational acceleration             | $1.618 \text{ m/s}^2$                |
| Projectile Diameter                            | 200 to 420 km                        |
| Impact Velocity                                | 15 km/s                              |
| Target Mantle Radius                           | 1740 km                              |
| Target Core Radius                             | 350 km                               |

**Supplemental Table DR2: iSALE-3D material input parameters (Chicxulub release)**

| Description                                | Values for Dunite         | Values for Iron         |
|--------------------------------------------|---------------------------|-------------------------|
| Equation of State                          | ANEOS Dunite <sup>a</sup> | ANEOS Iron <sup>b</sup> |
| Melting Temperature                        | 1373 K                    | 1811 K                  |
| Specific Heat                              | 1300                      | 600                     |
| Poisson's ratio                            | 0.25                      | 0.25                    |
| Thermal Softening Model                    | Ohnaka (1995)             | Ohnaka (1995)           |
| Thermal Softening Parameter <sup>c</sup>   | 1.1                       | 1.2                     |
| Simon A parameter <sup>c</sup>             | 1520 MPa                  | 6000 MPa                |
| Simon B parameter <sup>c</sup>             | 4.05                      | 3.00                    |
| Cohesion (undamaged) <sup>d</sup>          | 5.07 MPa                  | 0                       |
| Cohesion (damaged) <sup>d</sup>            | 0.01 MPa                  | 0.01 MPa                |
| Frictional Coeff. (undamaged) <sup>d</sup> | 1.58                      | 0                       |
| Frictional Coeff. (damaged) <sup>d</sup>   | 0.63                      | 0.4                     |
| Strength at Infinite Pressure <sup>d</sup> | 3.26 GPa                  | 2.50 GPa                |
| Strain Coefficient, a*                     | N/A                       | 3.24E+08                |
| Strain Coefficient, b*                     | N/A                       | 1.14E+08                |
| Strain Exponent, n*                        | N/A                       | 0.42                    |
| Strain rate coefficient, c*                | N/A                       | 0                       |
| Pressure coefficient, d*                   | N/A                       | 0                       |
| Minimum Pressure*                          | N/A                       | 0 Pa                    |
| Porosity Model                             | None                      | None                    |

<sup>a</sup>See Benz et al. (Benz et al., 1989). <sup>b</sup> See Thompson et al. (Thompson, 1990) <sup>c</sup>See Wünnemann et al. (Wünnemann et al., 2006) and Ohnaka (Ohnaka, 1995) for a thermal softening model description within iSALE. <sup>d</sup>See Collins et al. (Collins et al., 2004), for the pressure and damage dependent strength model description within iSALE. \*See Johnson and Cook (Johnson and Cook, 1983) for a strain and strain-rate dependent strength model developed for metals.

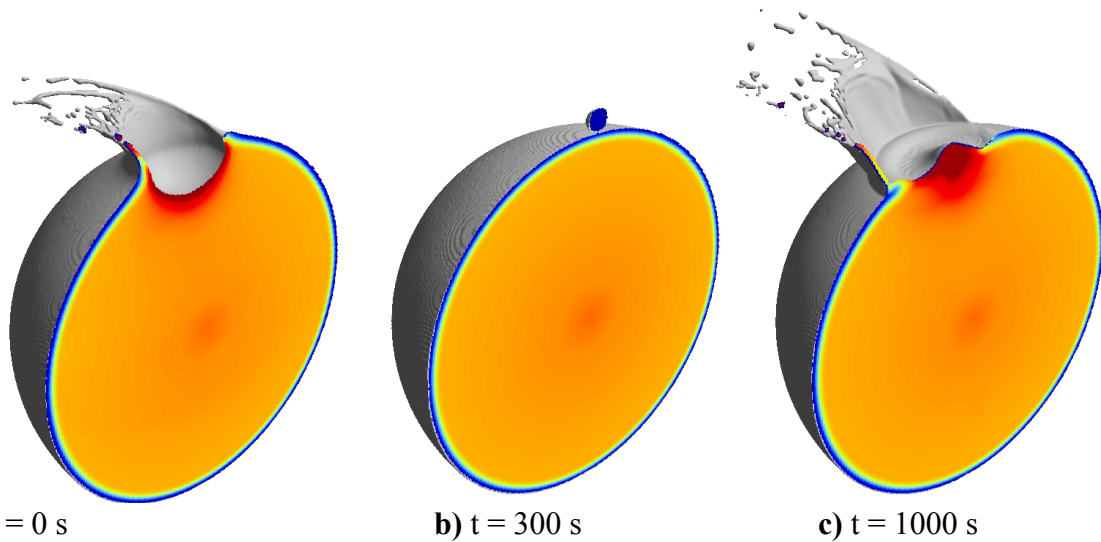

**Supplemental Figure DR1:** Before impact, transient crater formation, and crater collapse of an impact of a 200 km diameter impactor striking a 1740 km radius Moon with a 15 km/s impact velocity in iSALE-3D. The impact angle is  $45^\circ$  from the horizon. An isosurface (dark grey) represents the interface between the surface and vacuum (white region) and a temperature cross-section shows values from 300 K (blue) to  $>1900$  K (red).

Figure DR1 Animation

2017360\_Fig DR1 Animation.gif

118

119 a.)

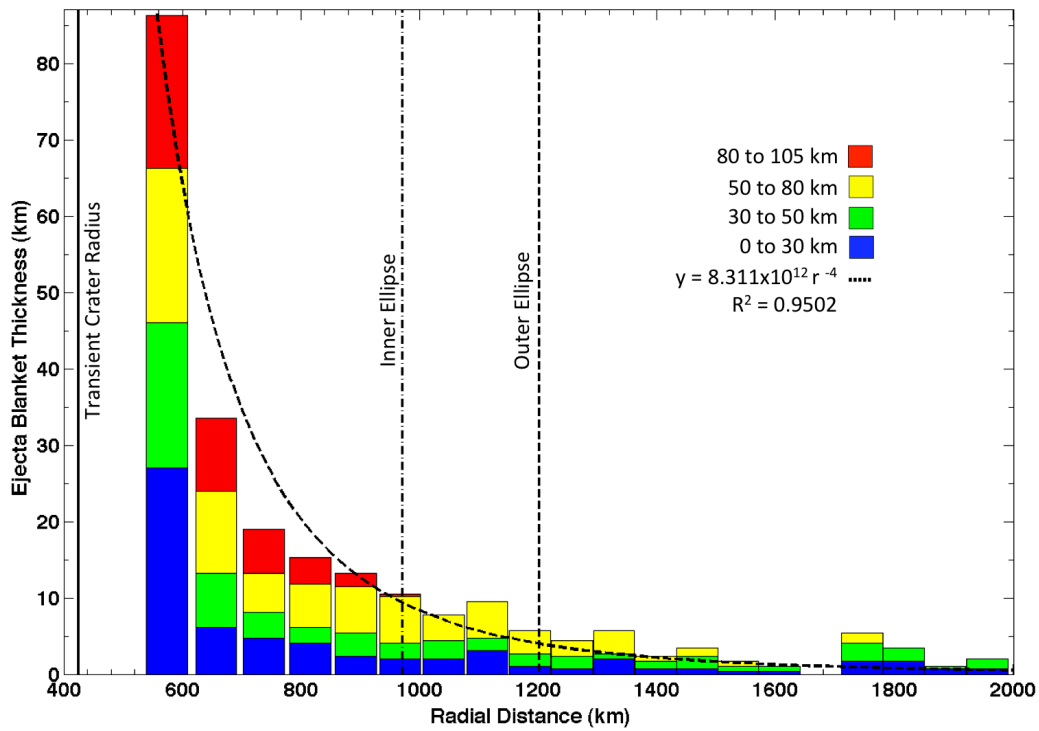

120

121 b.)

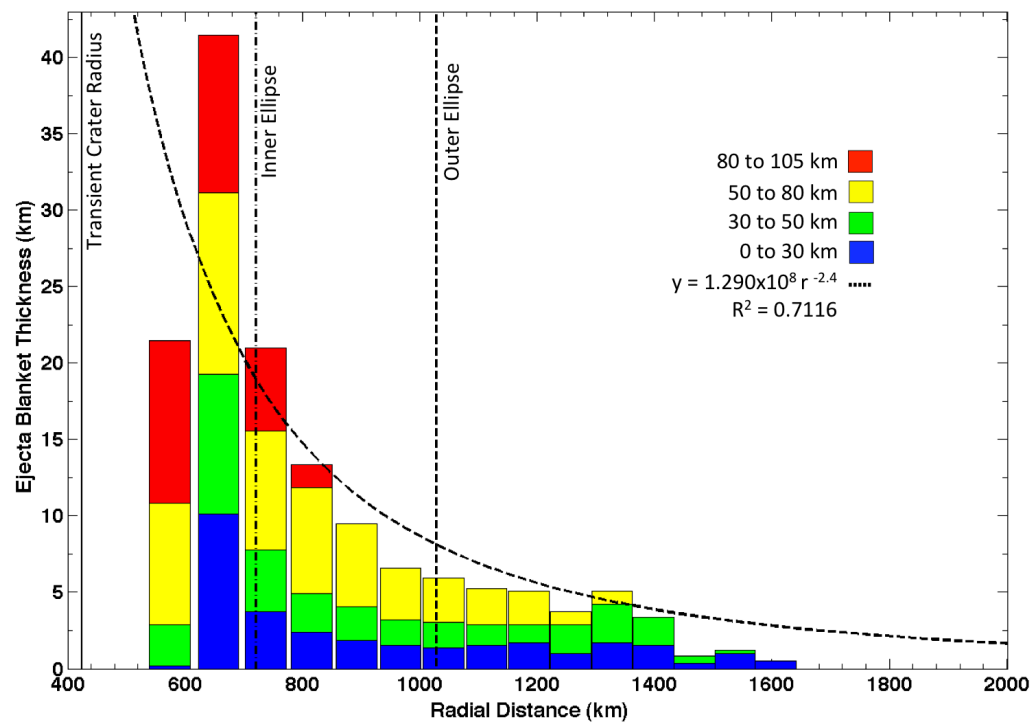

122

123

**Supplemental Figure DR2:** Ejecta thickness as a function of depth of origin along a radial line from the basin center, plotted along a line a.) 0° and b.) 90° to the impact direction (solid and dash red line in Figure 1 respectively) for the nominal 200 km diameter projectile striking at 45° to the surface. Because deeper-seated ejecta land later than shallower material, the stratigraphy is inverted, although mixing may occur due to the higher impact velocity at large ranges. The vertical lines correspond to the crater rim and the dashed circles plotted in Figure 1. The light dashed line is a best fit of the ejecta thickness to a  $1/r^N$  dependence of ejecta thickness on range. The large deviation at the crater rim will be quickly reduced as the transient crater collapses.

## **ORTHOPYROXENE AND OLIVINE IN HIGHLAND SAMPLES**

Two suites of highland samples have mineral abundances consistent with substantial amounts of low-Ca pyroxene in their mafic assemblages. One is a texturally and compositionally diverse group of breccias called the granulitic suite, which were thermally metamorphosed in large craters (Cushing et al. 1999; Hudgins et al. 2011). The granulitic suite shows distinctive correlations between mg# and increasing olivine/LCP (Fig. DR3) and decreasing plagioclase (not shown), suggesting that the rocks are mixtures of a mafic component with ferroan anorthosite. The data do not allow unambiguous identification of the mafic component (cumulate intrusive rocks such as troctolites and norites, or mantle rocks with varying LCP/olivine). Nevertheless, the data show that the granulitic suite contains substantial amounts of LCP. Normative mineral abundances in meteorites from the lunar highlands also indicate abundant LCP among the mafic minerals in the highlands (Fig. DR4). If the olivine-LCP component reflects the composition of the lunar mantle, then the mantle contains on average substantial amounts of both LCP and olivine.



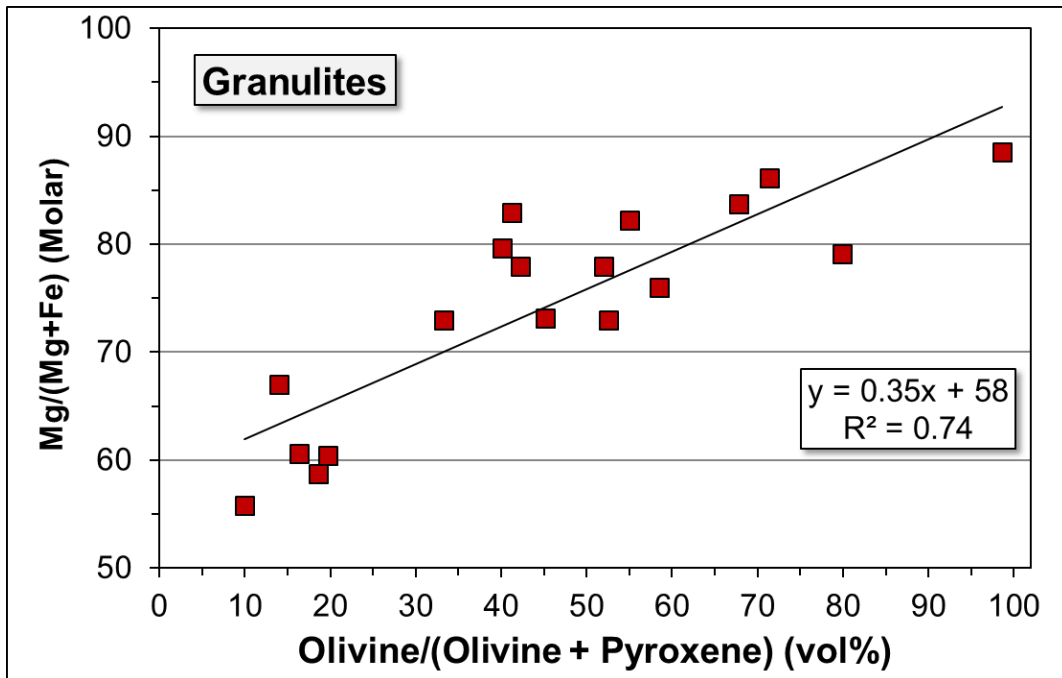

**Supplemental Figure DR3:** Modal olivine abundance (vol%) among all mafic silicates (olivine + Low-Ca Pyroxene + High-Ca Pyroxene) versus Mg#. The data fall along a linear trend suggesting that granulitic breccias are mixtures of ferroan anorthosites (low Mg#) with mafic rocks that vary in Mg# and olivine/orthopyroxene. Data from numerous sources in the literature.

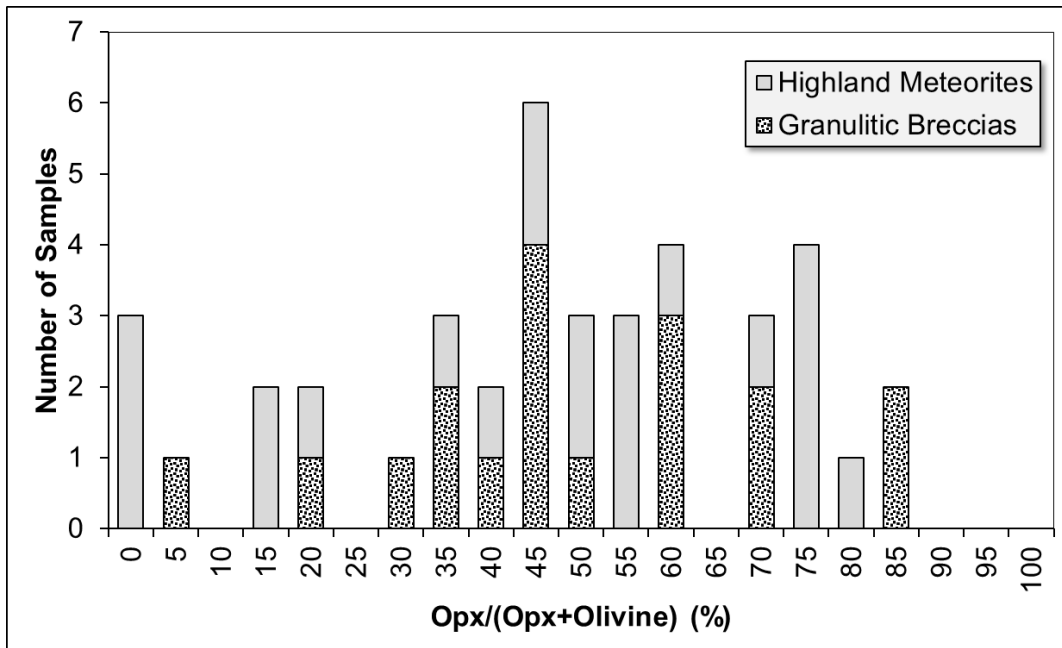

**Supplemental Figure DR4:** Frequency distribution of modal (granulitic breccias) and normative (lunar highland meteorites) of orthopyroxene (Opx) compared to the total olivine and orthopyroxene assemblage. The relative abundances of olivine and orthopyroxene vary widely, but over half of the samples in both groups of lunar samples contain more orthopyroxene than olivine. Data from numerous sources in the literature.

## **SPECTRAL ANALYSIS**

We used visible/near-infrared spectral data (0.43-3 $\mu$ m) from the Moon Mineralogy Mapper (M<sup>3</sup>) imaging spectrometer (Pieters et al., 2009; Green et al., 2011) (M<sup>3</sup>) on Chandrayaan-1 to characterize the iron-bearing minerals associated with SPA and surrounding terrains. M<sup>3</sup> Level 2 reflectance data from the global mapping campaign was acquired from the Planetary Data System, which includes corrections for thermal emission as well as topographic, photometric, and instrumental effects (Green et al., 2011; Clark et al., 2011; Hicks et al., 2011; Boardman et al., 2011; Besse et al., 2013). Our mosaics include 28 images (Supplemental Table DR3), all from the “2A” period of mission operations (April 15-27, 2009) with 140 m/pixel resolution.

VNIR spectral analysis cannot differentiate between pigeonite and a physical mixture of clinopyroxene and pure orthopyroxene. The average 1  $\mu$ m band centers over the entire mapped region are close to 0.95  $\mu$ m, which based on the results of Cloutis and Gaffey (1991), this implies that the bulk ejecta could contain up to 10-15% wollastonite or clinopyroxene. However, the strongest LCP signatures exhibit band centers closer to 0.92  $\mu$ m, consistent with very little (0-10%) wollastonite (e.g., Supplementary Figure DR5). In addition, the low band center and symmetric shape of 1  $\mu$ m bands in the ejecta suggests little to no olivine contribution (Horgan et al., 2014)

To extract information on iron mineralogy from the spectra, the overall continuum slope must be suppressed by removing an approximate continuum function using the linear convex hull method (Bennett et al., 2016). To find the continuum function, we first smooth each spectrum with nested boxcar average and median smoothing functions, both 3 channels wide. Then, we remove an initial estimate of the continuum, fit to fixed endpoints at 0.7, 1.5, and 2.6  $\mu$ m. Next, we fine-tune these endpoints for each spectrum by finding the local maxima in this initial continuum removed spectrum. For the 1  $\mu$ m

region, we find the local maxima between 0.6-1.0 and 1.0-1.7  $\mu\text{m}$ , which become the new endpoints. For the 2  $\mu\text{m}$  region, local maxima are found between the previous endpoint (between 1.0-1.7  $\mu\text{m}$ ) and 2.0  $\mu\text{m}$  and 2.0-2.6  $\mu\text{m}$ . These ranges avoid both possible long-wavelength plagioclase absorptions near 1.3  $\mu\text{m}$  and thermal effects beyond 2.6  $\mu\text{m}$ . Using the new endpoints, the final continuum of three joined linear segments is calculated from the original spectrum.

Iron-bearing minerals can be identified in  $M^3$  data based on the position and shape of the 1 and 2  $\mu\text{m}$  iron absorption bands, which vary significantly with mineralogy and composition (Adams, 1974; Cloutis and Gaffey, 1991; Sunshine and Pieters, 1993; Horgan et al., 2014). We use the methods of Horgan *et al.* (Horgan et al., 2014) to map the position of the 1 and 2  $\mu\text{m}$  iron absorption bands, which are indicators of iron mineralogy. Band position is parameterized as band center, calculated as the wavelength position of the minimum of a fourth-order polynomial fit to the spectrum within 0.1  $\mu\text{m}$  of the minimum channel in each band. Band depth is the percent depth below the continuum at the location of the band center (*i.e.*, one minus the value of the continuum removed spectrum at that wavelength). The 1 and 2  $\mu\text{m}$  band positions together can be used to broadly distinguish between orthopyroxene (OPX; band centers between 0.9-0.94 and 1.8-1.95  $\mu\text{m}$ ), clinopyroxene (CPX; 0.98-1.06 and 2.05-2.4  $\mu\text{m}$ ), and iron-bearing glass (1.06-1.2 and 1.9-2.05  $\mu\text{m}$ ). Mixtures of these minerals have band centers that fall in the intermediate regions between the endmembers (Horgan et al., 2014). Other iron-bearing minerals can also be identified using similar methods. Olivine exhibits a characteristically asymmetric 1  $\mu\text{m}$  band typically centered near 1.05-1.08  $\mu\text{m}$  and plagioclase feldspars exhibit broad and shallow bands centered between 1.25-1.35  $\mu\text{m}$ , but neither exhibits a corresponding 2  $\mu\text{m}$  band.

Once band parameters are calculated, the resulting parameter images are mapped into a mosaic with a local cylindrical projection at 140 m/pixel horizontal resolution (Figure 3).

218

219 **Supplemental Table DR3:** M<sup>3</sup> images used to construct mosaic shown in Figures 3 and

220 Supplemental Figure DR5.

| Product ID                 | Observation Time        | Center Latitude<br>(°N) | Center Longitude<br>(°E) |
|----------------------------|-------------------------|-------------------------|--------------------------|
| M3G20090424T010115_V01_RFL | 2009-04-24T01:23:31.000 | -23.045                 | 241.168                  |
| M3G20090424T031100_V01_RFL | 2009-04-24T03:34:29.000 | 16.468                  | 240.198                  |
| M3G20090424T050542_V01_RFL | 2009-04-24T05:25:20.000 | -5.585                  | 238.938                  |
| M3G20090424T070715_V01_RFL | 2009-04-24T07:30:44.000 | 16.945                  | 238.105                  |
| M3G20090424T085330_V01_RFL | 2009-04-24T09:17:14.500 | -18.333                 | 237.05                   |
| M3G20090424T191252_V01_RFL | 2009-04-24T19:27:00.000 | 41.377                  | 231.182                  |
| M3G20090424T204145_V01_RFL | 2009-04-24T20:50:11.000 | -65.399                 | 230.521                  |
| M3G20090424T205837_V01_RFL | 2009-04-24T21:13:55.500 | 7.295                   | 230.199                  |
| M3G20090424T225130_V01_RFL | 2009-04-24T23:07:19.000 | -6.977                  | 229.293                  |
| M3G20090425T024715_V01_RFL | 2009-04-25T02:57:57.500 | -23.702                 | 227.212                  |
| M3G20090425T043400_V01_RFL | 2009-04-25T04:43:54.500 | -60.745                 | 226.512                  |
| M3G20090425T045349_V01_RFL | 2009-04-25T05:08:01.000 | 13.112                  | 225.975                  |
| M3G20090425T064315_V01_RFL | 2009-04-25T06:58:15.500 | -10.814                 | 225.073                  |
| M3G20090425T083000_V01_RFL | 2009-04-25T08:42:57.000 | -51.704                 | 224.421                  |
| M3G20090425T202308_V01_RFL | 2009-04-25T20:44:48.000 | -9.985                  | 217.877                  |
| M3G20090425T222745_V01_RFL | 2009-04-25T22:50:47.000 | 14.306                  | 216.639                  |
| M3G20090426T001430_V01_RFL | 2009-04-26T00:35:15.500 | -27.142                 | 215.83                   |
| M3G20090426T041030_V01_RFL | 2009-04-26T04:34:37.000 | -17.046                 | 213.824                  |
| M3G20090426T061945_V01_RFL | 2009-04-26T06:43:36.500 | 16.539                  | 212.169                  |
| M3G20090426T080645_V01_RFL | 2009-04-26T08:24:01.500 | -37.386                 | 211.727                  |
| M3G20090426T120245_V01_RFL | 2009-04-26T12:20:36.500 | -35.643                 | 209.331                  |
| M3G20090426T141200_V01_RFL | 2009-04-26T14:17:39.500 | -38.692                 | 208.292                  |
| M3G20090426T142319_V01_RFL | 2009-04-26T14:41:23.500 | 34.043                  | 207.238                  |
| M3G20090426T160558_V01_RFL | 2009-04-26T16:19:53.000 | -25.757                 | 207.043                  |
| M3G20090426T180800_V01_RFL | 2009-04-26T18:15:02.500 | -34.483                 | 206.076                  |
| M3G20090426T182205_V01_RFL | 2009-04-26T18:32:56.000 | 20.317                  | 205.061                  |
| M3G20090426T195445_V01_RFL | 2009-04-26T20:06:44.000 | -53.767                 | 206.102                  |
| M3G20090426T235045_V01_RFL | 2009-04-27T00:01:18.000 | -58.136                 | 203.834                  |

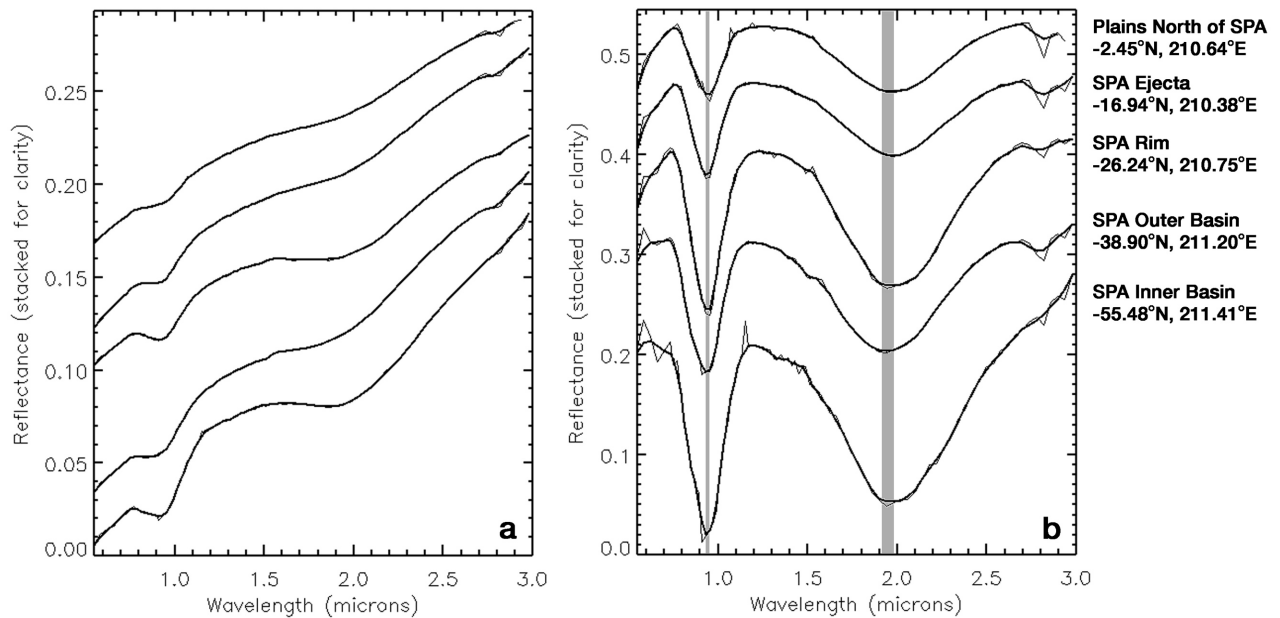

**Supplemental Figure DR5:** (a) Reflectance and (b) continuum removed spectra of LCP-dominated regions at locations indicated by lat/long coordinates, and by stars in Figure 3a. Grey bars indicate the range of ~1 and ~2  $\mu\text{m}$  band centers for these spectra, which are consistent with LCP.

## REFERENCES:

- Adams, J.B., 1974, Visible and near-infrared diffuse reflectance spectra of pyroxenes as applied to remote sensing of solid objects in the solar system: *Journal of Geophysical Research*, p. 1–8.
- Bennett, K.A., Horgan, B.H.N., Gaddis, L.R., Greenhagen, B.T., Allen, C.C., Hayne, P.O., Bell, J.F., III, and Paige, D.A., 2016, Complex explosive volcanic activity on the Moon within Oppenheimer crater: *Icarus*, v. 273, p. 1–19, doi: 10.1016/j.icarus.2016.02.007.
- Benz, W., Cameron, A., and Melosh, H.J., 1989, The origin of the Moon and the single-impact hypothesis III: *Icarus*, v. 81, p. 113–131.
- Besse, S., Sunshine, J., Staid, M., Boardman, J., Pieters, C., Guasqui, P., Malaret, E., McLaughlin, S., Yokota, Y., and Li, J.-Y., 2013, A visible and near-infrared photometric correction for Moon Mineralogy Mapper (M3): *Icarus*, v. 222, p. 229–242, doi: 10.1016/j.icarus.2012.10.036.
- Boardman, J.W., Pieters, C.M., Green, R.O., Lundeen, S.R., Varanasi, P., Nettles, J., Petro, N., Isaacson, P., Besse, S., and Taylor, L.A., 2011, Measuring moonlight: An

245 overview of the spatial properties, lunar coverage, selenolocation, and related Level  
 246 1B products of the Moon Mineralogy Mapper: *J. Geophys. Res.*, v. 116, p. 65–15,  
 247 doi: 10.1029/2010JE003730.

248 Clark, R.N., Pieters, C.M., Green, R.O., Boardman, J.W., and Petro, N.E., 2011, Thermal  
 249 removal from near-infrared imaging spectroscopy data of the Moon: *J. Geophys. Res.*,  
 250 v. 116, p. E00G14–9, doi: 10.1029/2010JE003751.

251 Cloutis, E.A., and Gaffey, M.J., 1991, Spectral-compositional variations in the  
 252 constituent minerals of mafic and ultramafic assemblages and remote sensing  
 253 implications: *Earth*, v. 53, p. 11–53, doi: 10.1007/BF00116217.

254 Collins, G.S., Melosh, H.J., and IVANOV, B.A., 2004, Modeling damage and  
 255 deformation in impact simulations: *Meteoritics and Planetary Science*, v. 39, p. 217–  
 256 231, doi: 10.1111/j.1945-5100.2004.tb00337.x.

257 Cushing, J. A., Taylor, G. J., Norman, M. D. & Keil, K. The granulitic impactite suite:  
 258 Impact melts and metamorphic breccias of the early lunar crust. *Meteoritics*  
 259 & *Planetary Science* **34**, 185–195 (1999).  
 260

261 Hudgins, J. A., Spray, J. G. & Hawkes, C. D. Element diffusion rates in lunar granulitic  
 262 breccias: Evidence for contact metamorphism on the Moon. *American Mineralogist*  
 263 **96**, 1673–1685 (2011).2011.

264 Elbeshhausen, D., and Wünnemann, K., 2011, iSALE-3D: A three-dimensional, multi-  
 265 material, multi-rheology hydrocode and its applications to large-scale geodynamic  
 266 processes, *in* Schäfer, F. and Hiermaier, S. eds., Proceedings of 11th Hypervelocity  
 267 Impact Symposium (HVIS), Stuttgart, Fraunhofer Verlag, p. 287–301.

268 Elbeshhausen, D., Wünnemann, K., and Collins, G.S., 2009, Scaling of oblique impacts in  
 269 frictional targets: Implications for crater size and formation mechanisms: *Icarus*, v.  
 270 204, p. 716–731, doi: 10.1016/j.icarus.2009.07.018.

271 Garrick-Bethell, I., and Zuber, M.T., 2009, Elliptical structure of the lunar South Pole-  
 272 Aitken basin: *Icarus*, v. 204, p. 399–408, doi: 10.1016/j.icarus.2009.05.032.

273 Green, R.O., Pieters, C., Mouroulis, P., Eastwood, M., Boardman, J., Glavich, T.,  
 274 Isaacson, P., Annadurai, M., Besse, S., Barr, D., Buratti, B., Cate, D., Chatterjee, A.,  
 275 Clark, R., et al., 2011, The Moon Mineralogy Mapper (M<sup>3</sup>) imaging spectrometer  
 276 for lunar science: Instrument description, calibration, on-orbit measurements, science  
 277 data calibration and on-orbit validation: *J. Geophys. Res.*, v. 116, p. 367–31, doi:  
 278 10.1029/2011JE003797.

279 Hicks, M.D., Buratti, B.J., Nettles, J., Staid, M., Sunshine, J., Pieters, C.M., Besse, S.,  
 280 and Boardman, J., 2011, A photometric function for analysis of lunar images in the  
 281 visual and infrared based on Moon Mineralogy Mapper observations: *J. Geophys.*  
 282 *Res.*, v. 116, p. 392–10, doi: 10.1029/2010JE003733.

283 Hirt, C.W., Amsden, A.A., and cook, J.L., 1974, An arbitrary Lagrangian-Eulerian  
 284 comuting method for all flow speeds: Journal of Computataional Physics, v. 14, p.  
 285 227–253.

286 Horgan, B.H.N., Cloutis, E.A., Mann, P., and Bell, J.F., III, 2014, Near-infrared spectra  
 287 of ferrous mineral mixtures and methods for their identification in planetary surface  
 288 spectra: Icarus, v. 234, p. 132–154, doi: 10.1016/j.icarus.2014.02.031.

289 Johnson, G.R., and Cook, W.H., 1983, A constitutive model and data for metals subjected  
 290 to large strains, high strain rates and high temperatures, *in* v. 21.

291 Laneuville, M., Wieczorek, M.A., Breuer, D., and Tosi, N., 2013, Asymmetric thermal  
 292 evolution of the Moon: Journal of Geophysical Research: Planets, v. 118, p. 1435–  
 293 1452, doi: 10.1002/jgre.20103.

294 Marsh, S. P., 1980, LASL Shock Hugoniot Data, Berkeley, University of California Press,  
 295 658 p.

296 Melosh, H.J., 1989, Impact Cratering: A Geologic Process: New York, Oxford University  
 297 Press, 245 p.

298 Ohnaka, M., 1995, A shear failure strength law of rock in the brittle-plastic transition  
 299 regime: Geophys. Res. Lett, v. 22, p. 25–28.

300 Pierazzo, E., Artemieva, N., Asphaug, E., Baldwin, E.C., Cazamias, J., Coker, R., Collins,  
 301 G.S., Crawford, D.A., Davison, T., Elbeshausen, D., Holsapple, K.A., Housen, K.R.,  
 302 Korycansky, D.G., and Wünnemann, K., 2008, Validation of numerical codes for  
 303 impact and explosion cratering: Impacts on strengthless and metal targets:  
 304 Meteoritics and Planetary Science, v. 43, p. 1917–1938, doi: 10.1111/j.1945-  
 305 5100.2008.tb00653.x.

306 Pierazzo, E., Vickery, A.M., and Melosh, H.J., 1997, A reevaluation of impact melt  
 307 production: Icarus, v. 127, p. 408–423, doi: 10.1006/icar.1997.5713.

308 Pieters, C.M., Boardman, J., Buratti, B., and Chatterjee, A., 2009, The Moon Mineralogy  
 309 Mapper (M3) on Chandrayaan-1: Curr Sci.

310 Potter, R.W.K., Collins, G.S., Kiefer, W.S., McGovern, P.J., and Kring, D.A., 2012,  
 311 Constraining the size of the South Pole-Aitken basin impact: Icarus, v. 220, p. 730–  
 312 743, doi: 10.1016/j.icarus.2012.05.032.

313 Sunshine, J.M., and Pieters, C.M., 1993, Estimating Modal Abundances From the Spectra  
 314 of Natural and Laboratory Pyroxene Mixtures Using the Modified Gaussian Model:  
 315 Journal of Geophysical Research (ISSN 0148-0227), v. 98, p. 9075–9087, doi:  
 316 10.1029/93JE00677.

317 Thompson, S.L., 1990, ANEOS: Analytic equations of state for shock physics codes  
 318 input manual: Sandia National Laboratories.

319 Wieczorek, M.A., Neumann, G.A., Nimmo, F., Kiefer, W.S., Taylor, G.J., Melosh, H.J.,  
 320 Phillips, R.J., Solomon, S.C., Andrews-Hanna, J.C., Asmar, S.W., Konopliv, A.S.,  
 321 Lemoine, F.G., Smith, D., Watkins, M.M., et al., 2013, The Crust of the Moon as  
 322 Seen by GRAIL: *Science*, v. 339, p. 671–675, doi: 10.1126/science.1231530.

323 Wünnemann, K., Collins, G.S., and Melosh, H.J., 2006, A strain-based porosity model  
 324 for use in hydrocode simulations of impacts and implications for transient crater  
 325 growth in porous targets: *Icarus*, v. 180, p. 514–527, doi:  
 326 10.1016/j.icarus.2005.10.013.

327
